# Supplementary material
Source: PubMed Central journal article supplement (PMC6647792)

**Ameloblastin binds to phospholipid bilayers via a helix-forming motif within the sequence encoded by exon 5**

*Jingtian Su<sup>1</sup>, Natalie C. Kegulian<sup>1</sup>, Rucha Arun Bapat<sup>1</sup>, and Janet Moradian-Oldak<sup>1\*</sup>*

<sup>1</sup>Center for Craniofacial Molecular Biology, Herman Ostrow School of Dentistry, University of Southern California, 2250 Alcazar St. Los Angeles, CA 90033, USA

**\*All correspondence may be addressed to:**

Dr. Janet Moradian-Oldak, Center for Craniofacial Molecular Biology, University of Southern California, Los Angeles, CA.

Phone: 323-442-7504

Fax: 323-442-2981

Email: [joldak@usc.edu](mailto:joldak@usc.edu)

**Table S1.** GenBank accession numbers of Ambn protein sequences from 47 species for bioinformatic analysis reported in Table 1 and figure 7.

| <b>No.</b> | <b>Species</b>                        | <b>GenBank No.</b> | <b>Lineage</b> |
|------------|---------------------------------------|--------------------|----------------|
| 1          | <i>Ailuropoda melanoleuca</i>         | EFB23251.1         | Mammalia       |
| 2          | <i>Balaenoptera acutorostrata</i>     | XP_007193625.1     | Mammalia       |
| 3          | <i>Bos mutus</i>                      | ELR55446.1         | Mammalia       |
| 4          | <i>Bos taurus</i>                     | AAD39833.2         | Mammalia       |
| 5          | <i>Camelus ferus</i>                  | XP_006188736.1     | Mammalia       |
| 6          | <i>Canis lupus familiaris</i>         | XP_539304.3        | Mammalia       |
| 7          | <i>Castor canadensis</i>              | APY20149.1         | Mammalia       |
| 8          | <i>Cavia porcellus</i>                | XP_005002729.1     | Mammalia       |
| 9          | <i>Ceratotherium simum simum</i>      | XP_004419200.1     | Mammalia       |
| 10         | <i>Chrysochloris asiatica</i>         | XP_006873854.1     | Mammalia       |
| 11         | <i>Cricetulus griseus</i>             | ERE87609.1         | Mammalia       |
| 12         | <i>Dasypus novemcinctus</i>           | XP_012374726.1     | Mammalia       |
| 13         | <i>Elephantulus edwardii</i>          | XP_006896906.1     | Mammalia       |
| 14         | <i>Equus przewalskii</i>              | XP_008528890.1     | Mammalia       |
| 15         | <i>Fukomys damarensis</i>             | KFO22787.1         | Mammalia       |
| 16         | <i>Galeopterus variegatus</i>         | XP_008584653.1     | Mammalia       |
| 17         | <i>Heterocephalus glaber</i>          | EHB10658.1         | Mammalia       |
| 18         | <i>Homo sapiens</i>                   | AAF37355.1         | Mammalia       |
| 19         | <i>Ictidomys tridecemlineatus</i>     | XP_005333329.1     | Mammalia       |
| 20         | <i>Macaca fascicularis</i>            | EHH53750.1         | Mammalia       |
| 21         | <i>Macaca mulatta</i>                 | XP_014994033.1     | Mammalia       |
| 22         | <i>Monodelphis domestica</i>          | XP_007495581.1     | Mammalia       |
| 23         | <i>Mus musculus</i>                   | AAB93765.1         | Mammalia       |
| 24         | <i>Myotis brandtii</i>                | XP_005881709.1     | Mammalia       |
| 25         | <i>Myotis davidii</i>                 | ELK25525.1         | Mammalia       |
| 26         | <i>Ornithorhynchus anatinus</i>       | XP_016083225.1     | Mammalia       |
| 27         | <i>Orycteropus afer afer</i>          | XP_007941009.1     | Mammalia       |
| 28         | <i>Oryctolagus cuniculus</i>          | XP_008265993.1     | Mammalia       |
| 29         | <i>Pteropus alecto</i>                | XP_006917342.1     | Mammalia       |
| 30         | <i>Pteropus vampyrus</i>              | XP_011358803.1     | Mammalia       |
| 31         | <i>Rattus norvegicus</i>              | CAA90414.1         | Mammalia       |
| 32         | <i>Sarcophilus harrisii</i>           | XP_012407378.1     | Mammalia       |
| 33         | <i>Sorex araneus</i>                  | XP_004617937.1     | Mammalia       |
| 34         | <i>Sus scrofa</i>                     | AAA85588.1         | Mammalia       |
| 35         | <i>Trichechus manatus latirostris</i> | XP_004383413.1     | Mammalia       |
| 36         | <i>Tupaia chinensis</i>               | XP_014441212.1     | Mammalia       |

|    |                                   |                |                |
|----|-----------------------------------|----------------|----------------|
| 37 | <i>Tursiops truncatus</i>         | XP_019788214.1 | Mammalia       |
| 38 | <i>Alligator mississippiensis</i> | KYO35091.1     | Reptilia       |
| 39 | <i>Anolis carolinensis</i>        | ALA62321.1     | Reptilia       |
| 40 | <i>Caiman crocodilus</i>          | AAK92227.1     | Reptilia       |
| 41 | <i>Chelonia mydas</i>             | XP_007057987.1 | Reptilia       |
| 42 | <i>Ophiophagus hannah</i>         | ETE66901.1     | Reptilia       |
| 43 | <i>Python bivittatus</i>          | XP_007425899.1 | Reptilia       |
| 44 | <i>Xenopus laevis</i>             | AAO65388.1     | Amphibia       |
| 45 | <i>Xenopus tropicalis</i>         | XP_002938667.2 | Amphibia       |
| 46 | <i>Latimeria chalumnae</i>        | XP_006011890.1 | Sarcopterygii  |
| 47 | <i>Lepisosteus oculatus</i>       | AMD08894.1     | Actinopterygii |

**Table S2.** Helical regions of mouse Ambn as calculated by Heliquist. AH: Amphipathic Helix. The sequences from 239 to 260 were not assigned as amphipathic helix because these sequences had proline in the middle of the sequences.

| Potential AH motifs                              | Net charge | Hydrophobic moment | Hydrophobic face | AH |
|--------------------------------------------------|------------|--------------------|------------------|----|
| <sup>58</sup> LQGLNALSQYSRLGFGKA <sup>75</sup>   | 2          | 0.233              | Y G G L A        | Y  |
| <sup>59</sup> QGLNALSQYSRLGFGKAL <sup>76</sup>   | 2          | 0.233              | Y G G L A        | Y  |
| <sup>60</sup> GLNALSQYSRLGFGKALN <sup>77</sup>   | 2          | 0.255              | Y G G L A        | Y  |
| <sup>69</sup> RLGFGKALNSLWLHGLLP <sup>86</sup>   | 2          | 0.129              | A P L F G L      | Y  |
| <sup>239</sup> AYGTLFPRFGGFRQTLRR <sup>256</sup> | 4          | 0.406              | A F L L F Y      | ?  |
| <sup>240</sup> YGTLPFRFGGFRQTLRRL <sup>257</sup> | 4          | 0.450              | L F L L F Y      | ?  |
| <sup>241</sup> GTLFPRFGGFRQTLRRLN <sup>258</sup> | 4          | 0.399              | L F L L F        | ?  |
| <sup>242</sup> TLFPRFGGFRQTLRRLNQ <sup>259</sup> | 4          | 0.411              | L F L L F        | ?  |
| <sup>243</sup> LFPRFGGFRQTLRRLNQ <sup>260</sup>  | 4          | 0.422              | L F L L F        | ?  |

**Figure S1. Characterization of WT mouse Ambn and its mutants.** HPLC system (Varian) equipped with a Reversed Phase Phenomenex C4 column (10 × 250 mm, 5 μm) was used to purify Ambn. The purified protein was lyophilized, kept at -20°C, and dissolved in distilled water before use. The concentration of protein was determined using a Pierce BCA protein assay kit (Thermofisher). SDS-PAGE and mass spectrometry confirmed that the purified protein was Ambn. (A) SDS-PAGE showed that the purity of wild type Ambn was of sufficient quality for biochemical and biophysical experiments, while the apparent molecular weight was higher than the theoretical value. (B) Mass spectra of the band around 50 kDa in SDS-PAGE showed that the exact molecular weight of the purified protein was close to the theoretical value (41459.8 Da), suggesting that the purified protein was Ambn. (C) SDS-PAGE of AmbnW80F/W93F, AmbnW402F, AmbnΔ5 (36547.3 Da) and AmbnΔ6 (33991.4 Da) variants. (D) The sequence of mouse Ambn. The signal peptide is highlighted in yellow. The purified Ambn does not include this signal peptide. The sequence encoded by exon 5 is highlighted in green and is deleted in AmbnΔ5. The sequence encoded by exon 6 is highlighted in pink and is deleted in AmbnΔ6. W80 and W93 are in red and are replaced by F in W80F/W93F. W402 is in blue and replaced by F in W402F.

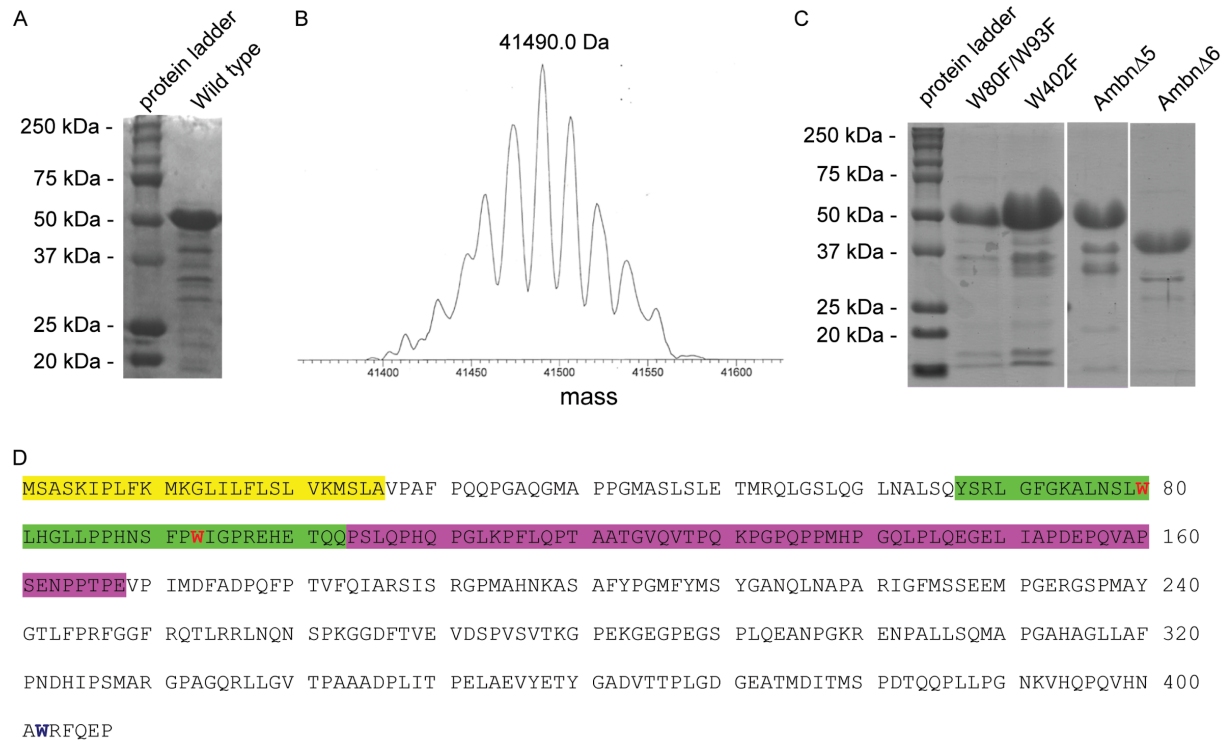

**Figure S2. DLS regularization curves showing particle size distribution (A, C, E, G, I &K) and correlation function (B, D, F, H, J & L) of WT Ambn, Ambn $\Delta$ 6, and Ambn $\Delta$ 5 at concentrations 1 and 3  $\mu$ M in PBS buffer, pH 7.4.** Lyophilized proteins were dissolved in pH 7.4, phosphate-buffered saline (PBS) composed of 10 mM sodium phosphate and 50 mM NaCl, and were diluted into 1 or 3  $\mu$ M in pH 7.4 10.0 mM PBS buffer. The diluted protein solutions were kept on ice. The protein samples were taken out from the ice and were kept at room temperature for 1 hour before measurement. DLS was performed at room temperature using a DynaPro Nanostar light scattering instrument (Wyatt) with 10  $\mu$ l cell. Each regularization curve was an average of ten acquisitions (10 scans for each acquisition). The data were analyzed using Dynamics 7.0, and the reported values were the hydrodynamic radii based on a Rayleigh sphere model.

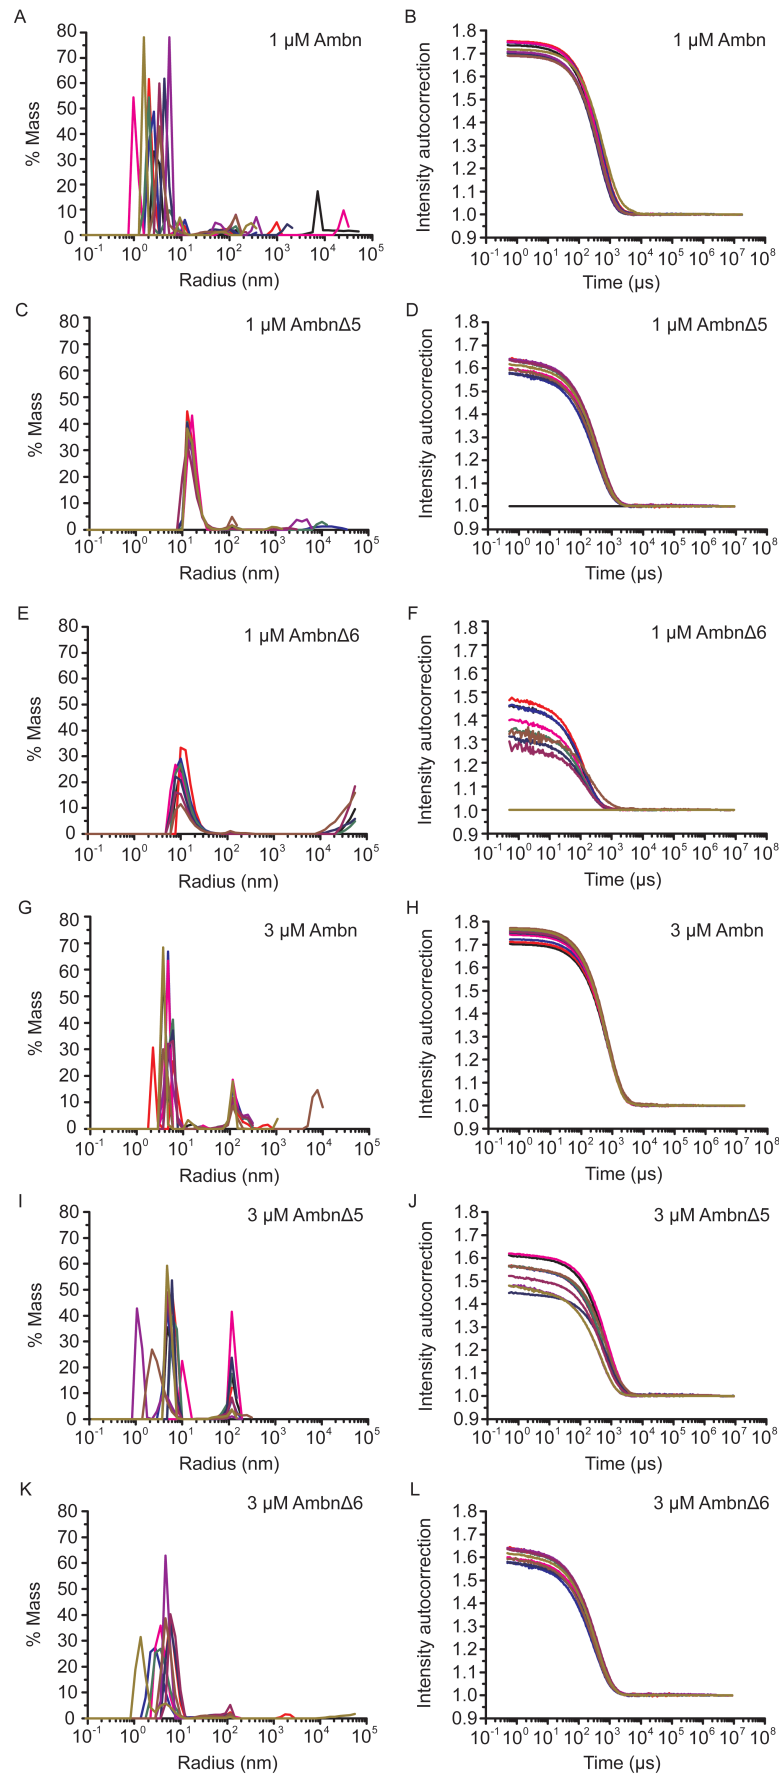

**Figure S3.** CD of Trp variants, AmbnW80F/W93F and AmbnW402F, compared to WT Ambn showing that the secondary structures were not affected by variations of Trp to Phe.

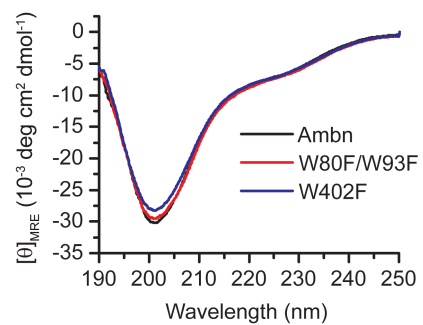

**Figure S4.** CD spectra of WT Ambn, Ambn $\Delta$ 5 and Ambn $\Delta$ 6 samples used for the study of LUV-protein interactions.

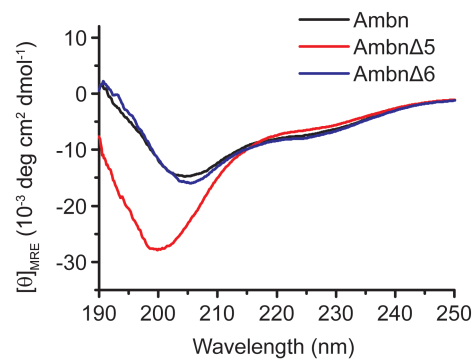

Supplement: ao8b03582_si_001.pdf [file ao8b03582_si_001.pdf]
